# Supplementary material
Source: Springer Nature journal article supplement (https://www.springerprofessional.de/resource/supplementary/13673_2012_41_MOESM1_ESM.pdf/11899370)
Supplement: MOESM1 [file 11899370]

Applications

Research, Collaboration, etc

User-Level Middleware

Resource Management,  
Scheduling, Security,  
Monitoring, etc

Core Middleware

Fabric

Computers, Networks,  
Operating Systems, etc
